# Supplementary material for: The Path to FAIR Research Models: Lessons Learned
Source: Copernicus journal article supplement (doi:10.5194/egusphere-2025-5256), 2026-01-08
Supplement: Supplementary file [file egusphere-2025-5256-AC2-supplement.pdf]

Reviewer 3 / Editor

Dear authors,

I have gone through your manuscript, and I would like to point out that the "Code and Data Availability" section, in its current form, is misleading. The section is there to declare the provenance and where to get the software necessary to replicate the presented work. Your manuscript discusses software, but does not depends on the mentioned ones to replicate it. Therefore, in this case, it is more accurate that declare in the section that **no code is necessary to produce the discussion and results presented in your manuscript.**

Thank you for this comment. We propose to follow the Editor's suggestion and revise the paragraph in the "Code and Data Availability" section to read: "No code is necessary to produce the discussion and results presented in this paper." At the same time, we will retain the statement describing the availability of the USGS catalog, including the link to the Zenodo repository: "The U.S. Geological Survey (USGS) model schema and metadata files describing USGS models are available under a Creative Commons CC0 1.0 Universal (CC0) license at: <https://doi.org/10.5281/zenodo.17408255>."

If I am wrong and I have missed any piece of code or model that you really use, then of course you should cite it, but GitHub sites and others not accepted according the policy of the journal are not valid. USE E.G. ZENODO

To comply with the journal's requirements, we will remove references to GitHub and other open-source code repositories and instead cite the corresponding resources via Zenodo repositories.

Juan A. Añel

Geosci. Model Dev. Executive Editor
